# Supplementary material for: Intermittent hypoxia regulates vasoactive molecules and alters insulin-signaling in vascular endothelial cells
Source: PubMed Central journal article supplement (PMC6148090; doi:10.1038/s41598-018-32490-3), 2018-09-20

## **Intermittent hypoxia regulates vasoactive molecules and alters insulin-signaling in vascular endothelial cells**

Pragya Sharma, Yu Dong, Virend K. Somers, Timothy E. Peterson, Yuebo Zhang, Shihan Wang, Guangxi Li, Prachi Singh

Fig 1d

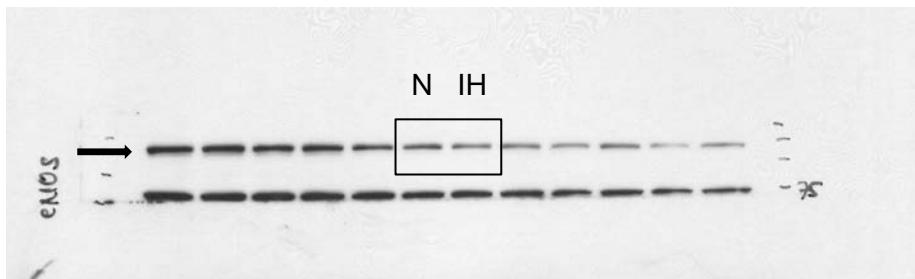

Fig 1d

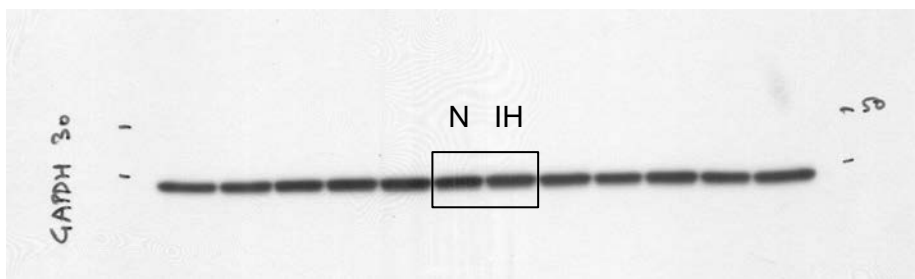

Fig 1e, peNOS

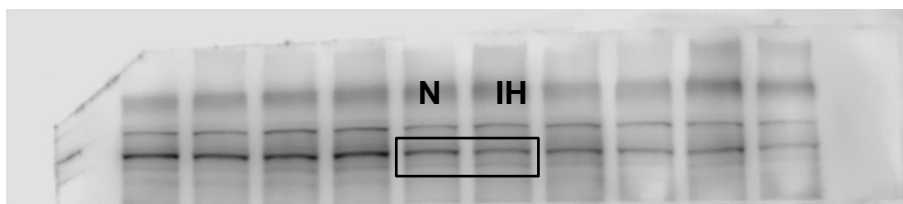

Fig 1e, 2b, GAPDH

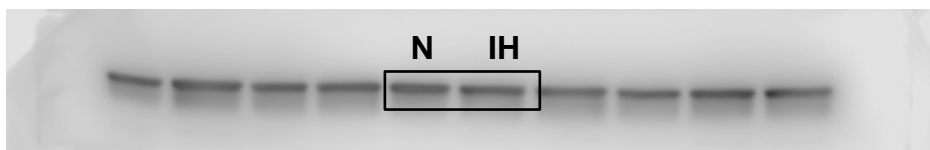

Fig 2b, ET-1

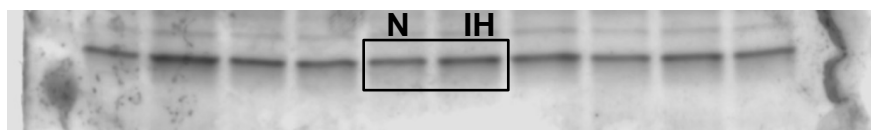



Fig 3a, pAKT

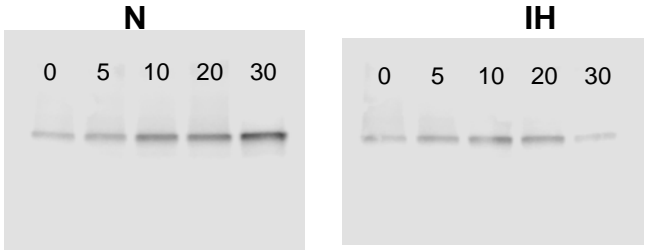

Fig 3a, AKT

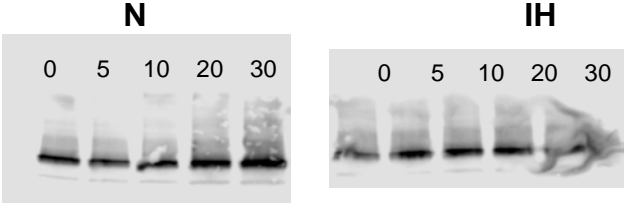

**N**

Fig 3c: pERK

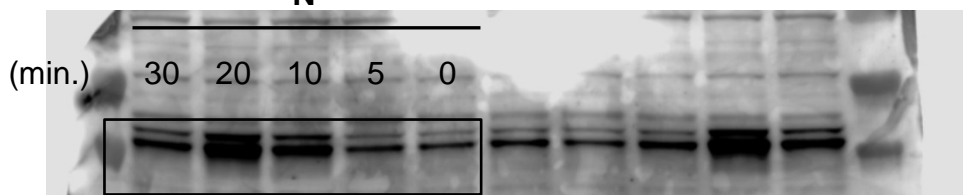

**N**

Fig 3c, ERK

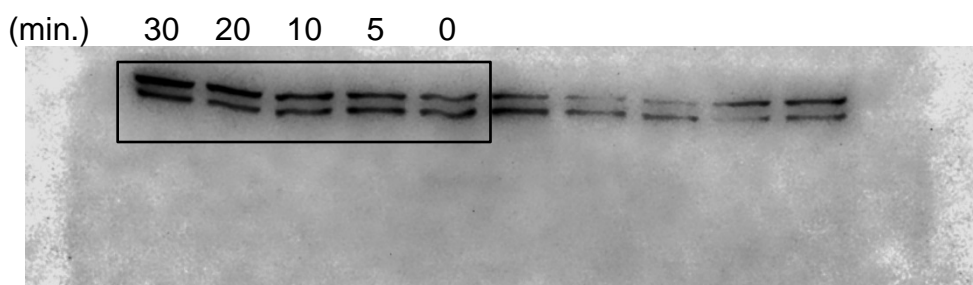

**IH**

Fig 3c: pERK

(min.) 0 5 10 20 30

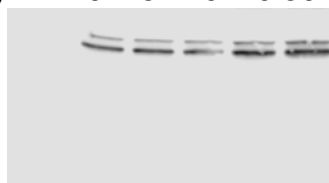

**IH**

Fig 3c, ERK

(min.) 0 5 10 20 30

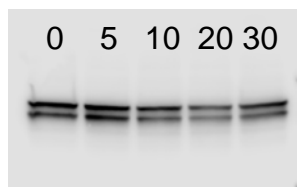

Fig 5

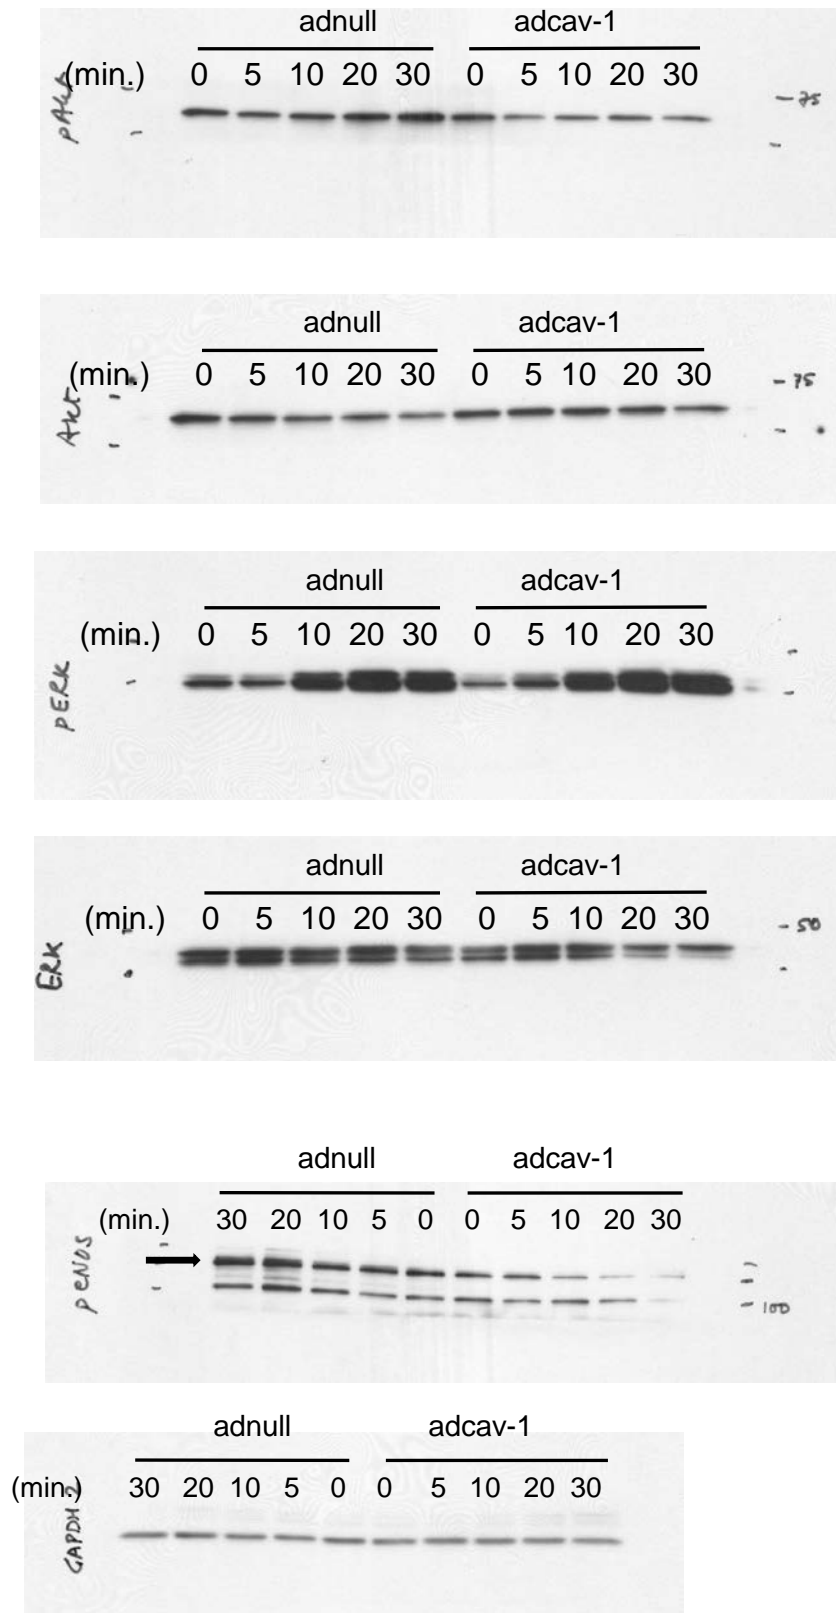

Supplement: 41598_2018_32490_MOESM1_ESM.pdf [file 41598_2018_32490_MOESM1_ESM.pdf]
